# Supplementary material for: Dietary Vitamin D Intake, Pain Incidence, and Pain Changes in Older Adults: The Seniors-ENRICA-1 Cohort
Source: MDPI journal article supplement (doi:10.3390/nu14183776), 2022-09-13
Supplement: s1 [file s1]

**Table S1.** Dietary sources of vitamin D intake ( $\mu\text{g/day}$ ) in older adults.

|                        | <b>Mean (standard deviation)</b> | <b>%</b>    |
|------------------------|----------------------------------|-------------|
| Total food             | 3.24 (2.47)                      | 100         |
| Fish                   | 2.24 (2.41)                      | 56.3 (28.9) |
| Oily fish              | 2.04 (2.37)                      | 51.3 (30.0) |
| White fish and seafood | 0.20 (0.70)                      | 4.99 (14.4) |
| Eggs                   | 0.39 (0.28)                      | 17.5 (15.5) |
| Meat                   | 0.17 (0.13)                      | 8.37 (9.86) |
| Red and processed meat | 0.11 (0.13)                      | 5.54 (8.22) |
| Poultry                | 0.06 (0.05)                      | 2.78 (4.04) |
| Offal                  | 0.00 (0.01)                      | 0.05 (0.56) |
| Cereals                | 0.23 (0.45)                      | 8.21 (14.5) |
| Pastries               | 0.09 (0.25)                      | 3.60 (9.10) |
| Whole-grain foods      | 0.07 (0.32)                      | 2.09 (8.26) |
| Breakfast cereals      | 0.04 (0.20)                      | 1.74 (8.05) |
| Cookies                | 0.01 (0.07)                      | 0.59 (2.99) |
| Pasta                  | 0.00 (0.03)                      | 0.14 (0.89) |
| Bread                  | 0.00 (0.01)                      | 0.03 (0.28) |
| Dairy                  | 0.14 (0.14)                      | 6.66 (8.40) |
| Whole                  | 0.12 (0.14)                      | 5.59 (7.55) |
| Low-fat                | 0.02 (0.02)                      | 1.07 (3.58) |
| Fats and oils          | 0.05 (0.20)                      | 1.83 (6.53) |
| Butter and margarine   | 0.05 (0.20)                      | 1.83 (6.53) |
| Oils                   | 0.00 (0.00)                      | 0.00 (0.02) |
| Vegetables             | 0.02 (0.10)                      | 0.74 (4.21) |
| Sauces and condiments  | 0.10 (0.01)                      | 0.20 (0.82) |
| Chocolate and cocoa    | 0.00 (0.01)                      | 0.12 (0.50) |
| Nonalcoholic beverages | 0.00 (0.00)                      | 0.03 (0.21) |
| Coffee and tea         | 0.00 (0.00)                      | 0.02 (0.21) |
| Other beverages        | 0.00 (0.00)                      | 0.00 (0.04) |
| Snacks                 | 0.00 (0.00)                      | 0.02 (0.25) |
| Other foods            | 0.00 (0.00)                      | 0.00 (0.00) |

**Table S2.** Sensitivity analyses. Associations of dietary vitamin D intake with pain incidence and changes in the pain scale over 5 years in older adults.

|                                                                 | Vitamin D intake <sup>a</sup> |                        |                       |                        |
|-----------------------------------------------------------------|-------------------------------|------------------------|-----------------------|------------------------|
|                                                                 | Tertile 1 (lowest)            | Tertile 2              | Tertile 3 (highest)   | Per 1-μg/day increment |
| <b>Pain incidence</b>                                           |                               |                        |                       |                        |
| Cases/n                                                         | 48/156                        | 46/188                 | 31/180                | 125/524                |
| Adjusted for calcium intake: OR (95% CI) <sup>b</sup>           | Ref.                          | 0.78 (0.47,1.32)       | 0.49 (0.27,0.88)*     | 0.88 (0.79,0.99)*      |
| Adjusted for sleep duration: OR (95% CI) <sup>b</sup>           | Ref.                          | 0.77 (0.46,1.31)       | 0.48 (0.27,0.87)*     | 0.88 (0.78,0.99)*      |
| Adjusted for sleep quality: OR (95% CI) <sup>b</sup>            | Ref.                          | 0.78 (0.46,1.31)       | 0.49 (0.27,0.88)*     | 0.88 (0.79,0.99)*      |
| Adjusted for vitamin D supplement use: OR (95% CI) <sup>b</sup> | Ref.                          | 0.79 (0.47,1.32)       | 0.49 (0.27,0.88)*     | 0.88 (0.79,0.99)*      |
| Cases/n                                                         | 45/150                        | 45/180                 | 31/177                | 121/507                |
| Excluding vitamin D supplement users: OR (95% CI) <sup>b</sup>  | Ref.                          | 0.84 (0.49,1.43)       | 0.52 (0.29,0.95)*     | 0.89 (0.80,1.00)*      |
| <b>Changes in the pain scale</b>                                |                               |                        |                       |                        |
| Pain worsening vs<br>no change/pain improvement                 |                               |                        |                       |                        |
| Cases/n                                                         | 69/278                        | 66/345                 | 49/327                | 184/950                |
| Adjusted for calcium intake: OR (95% CI) <sup>b</sup>           | Ref.                          | 0.73 (0.49,1.08)       | 0.55 (0.36,0.85)**    | 0.88 (0.81,0.96)**     |
| Adjusted for sleep duration: OR (95% CI) <sup>b</sup>           | Ref.                          | 0.72 (0.48,1.07)       | 0.54 (0.35,0.83)**    | 0.87 (0.80,0.96)**     |
| Adjusted for sleep quality: OR (95% CI) <sup>b</sup>            | Ref.                          | 0.72 (0.49,1.07)       | 0.55 (0.35,0.85)**    | 0.88 (0.81,0.96)**     |
| Adjusted for pain medications use: OR (95% CI) <sup>b</sup>     | Ref.                          | 0.72 (0.48,1.07)       | 0.54 (0.35,0.84)**    | 0.88 (0.81,0.96)**     |
| Adjusted for vitamin D supplement use: OR (95% CI) <sup>b</sup> | Ref.                          | 0.72 (0.49,1.07)       | 0.56 (0.36,0.86)**    | 0.88 (0.81,0.96)**     |
| Cases/n                                                         | 64/265                        | 61/326                 | 48/318                | 173/909                |
| Excluding vitamin D supplement users: OR (95% CI) <sup>b</sup>  | Ref.                          | 0.73 (0.48,1.09)       | 0.58 (0.37,0.91)*     | 0.89 (0.81,0.97)**     |
| <b>Change in the pain scale</b>                                 |                               |                        |                       |                        |
| n                                                               | 278                           | 345                    | 327                   | 950                    |
| Adjusted for calcium intake: β (95% CI) <sup>c</sup>            | Ref.                          | -0.56 (-1.01, -0.11)*  | -0.56 (-1.03, -0.09)* | -0.07 (-0.15, 0.00)    |
| Adjusted for sleep duration: β (95% CI) <sup>c</sup>            | Ref.                          | -0.58 (-1.02, -0.13)*  | -0.58 (-1.05, -0.11)* | -0.07 (-0.15, 0.00)    |
| Adjusted for sleep quality: β (95% CI) <sup>c</sup>             | Ref.                          | -0.57 (-1.02, -0.12)*  | -0.56 (-1.04, -0.09)* | -0.07 (-0.15, 0.00)    |
| Adjusted for pain medications use: β (95% CI) <sup>c</sup>      | Ref.                          | -0.62 (-1.04, -0.20)** | -0.58 (-1.03, -0.14)* | -0.06 (-0.13, 0.01)    |
| Adjusted for vitamin D supplement use: β (95% CI) <sup>c</sup>  | Ref.                          | -0.57 (-1.02, -0.12)*  | -0.56 (-1.03, -0.09)* | -0.07 (-0.15, 0.00)    |
| n                                                               | 265                           | 326                    | 318                   | 909                    |
| Excluding vitamin D supplement users: β (95% CI) <sup>c</sup>   | Ref.                          | -0.52 (-0.98, -0.06)*  | -0.50 (-0.98, -0.02)* | -0.07 (-0.15, 0.01)    |

\*p<0.05. \*\*p<0.01. OR: odds ratio. CI: confidence interval.

<sup>a</sup>Vitamin D intake categories: Tertile 1, 0.01 to 1.85 µg/day; Tertile 2, 1.85 to 3.51 µg/day; Tertile 3, 3.52 to 24.46 µg/day.

<sup>b</sup>Logistic regression model as Model 3 in Table 2 [adjusted for sex, age, and educational level (primary or less, secondary, or university), smoking status (never, former, or current), alcohol consumption (never, former, moderate, heavy), leisure-time physical activity (MET-hours/week), sedentary behavior (television hours/day), body mass index (kg/m<sup>2</sup>), energy intake (kcal/day), and number of chronic diseases (diabetes, cardiovascular disease, chronic lung disease, musculoskeletal disease, cancer, and depression), fiber, carbohydrate, unsaturated fat, and sodium intake].

<sup>c</sup>Linear regression model as Model 6 in Table 2 [adjusted for sex, age, and educational level (primary or less, secondary, or university), smoking status (never, former, or current), alcohol consumption (never, former, moderate, heavy), leisure-time physical activity (MET-hours/week), sedentary behavior (television hours/day), body mass index (kg/m<sup>2</sup>), energy intake (kcal/day), and number of chronic diseases (diabetes, cardiovascular disease, chronic lung disease, musculoskeletal disease, cancer, and depression), fiber, carbohydrate, unsaturated fat, and sodium intake].

**Figure S1.** Participants' flow chart.

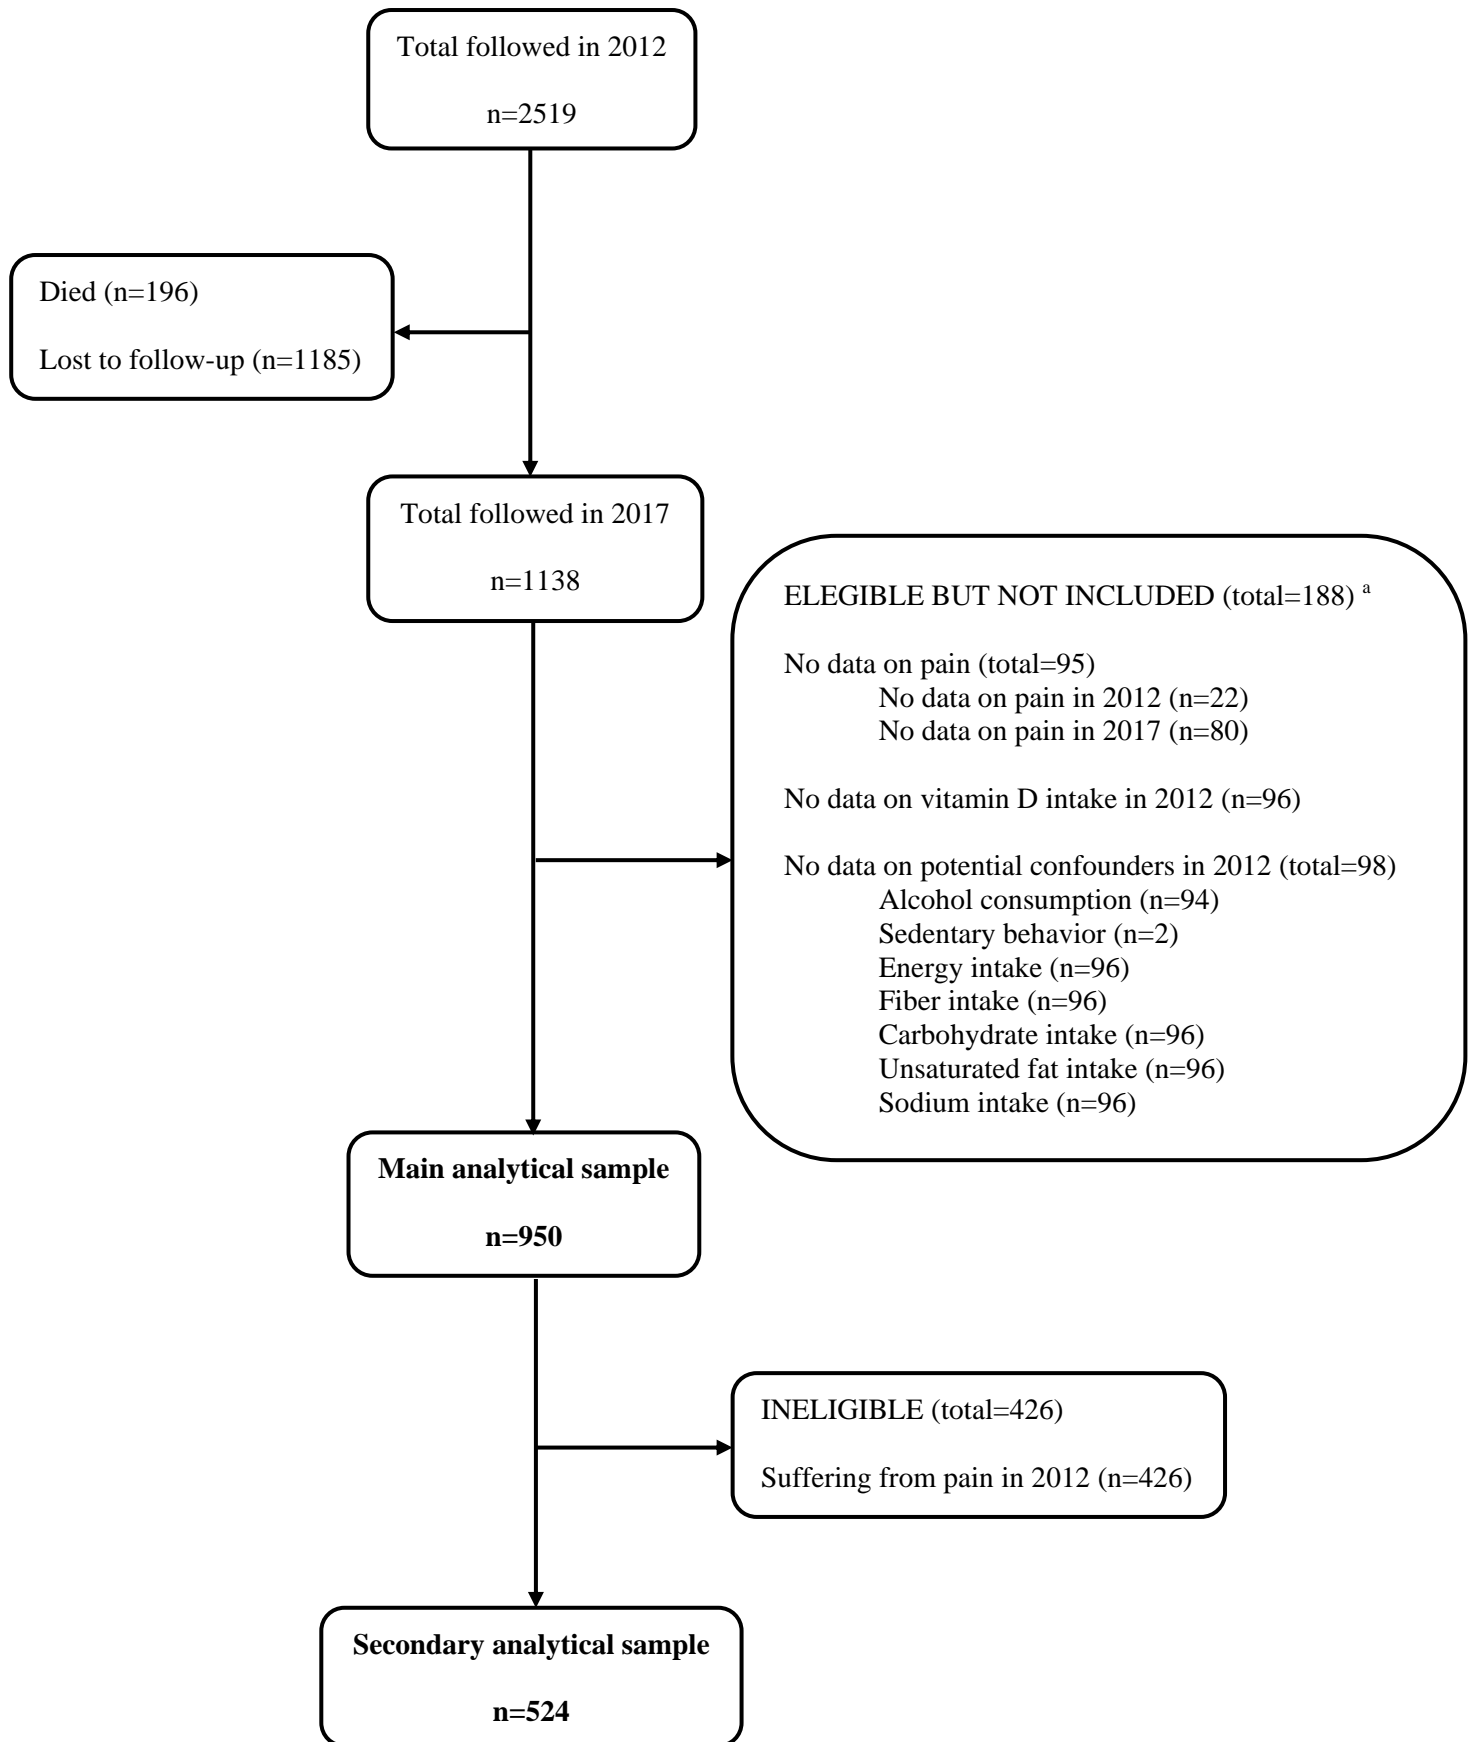

<sup>a</sup> Note that individuals may lack data in more than one variable.

**Figure S2.** Interaction analyses. Associations of dietary vitamin D intake with pain incidence and changes in the pain scale over 5 years in older adults.

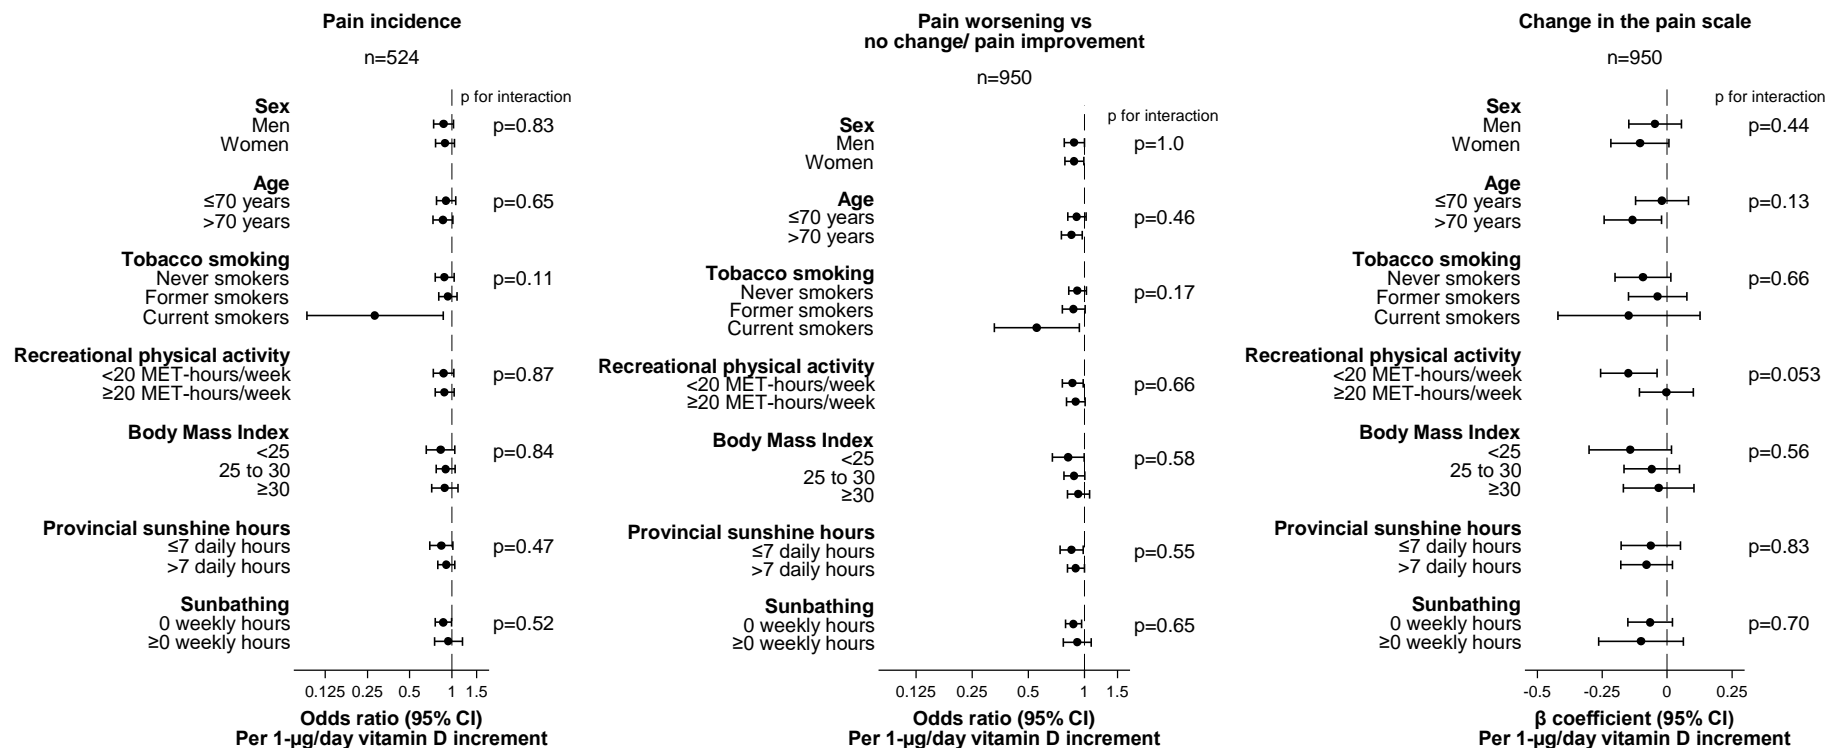

Plotted values are odds ratios (95% confidence intervals) from a model with interaction terms adjusted as the logistic regression Model 3 in Table 3, or  $\beta$  coefficients (95% confidence interval) from a model with interaction terms adjusted as the linear regression Model 6 in Table 3 [sex, age, educational level (primary or less, secondary, or university), smoking status (never, former, or current), alcohol consumption (never, former, moderate, heavy), leisure-time physical activity (MET-hours/week), sedentary behavior (television hours/day), body mass index (kg/m<sup>2</sup>), energy intake (kcal/day), number of chronic diseases (diabetes, cardiovascular disease, chronic lung disease, musculoskeletal disease, cancer, and depression), fiber, carbohydrate, unsaturated fat, and sodium intake].

Wald tests that compared models with and without interaction terms were used to evaluate the statistical significance of such interactions.
